# Supplementary material
Source: publisher site journal article supplement (https://www.dovepress.com/article/599161)
Supplement: Supplementary file 1 [file 599161_Supplementary%20Data%20for%20corrections_1_1.docx]

**Supplementary Data - Table S1:** ATC codes included and excluded for patient case selection based on claims data from AOK Baden-Württemberg, Germany, 2021

| **Included ATC Codes** | **Opioid** | **Excluded ATC Codes** | **Opioid** |
| --- | --- | --- | --- |
| N02AX06 | Tapentadol | N02AC06 | Levomethadone |
| N02AA01 | Morphine | N07BC05 | Levomethadone |
|  |  | N07BC02 | Methadone; |
| N02AA51 | Morphine combinations | N02AC52 | Methadon, combinations excl. Psycholeptics |
| N02AG01 | Morphine with antispasmodics | V04CN05 | Methadone test zone |
| N07BC09 | Morphine |  |  |
| N02AA05 | Oxycodone | V70AA01 | Methadone preparations |
| N02AJ18 | Oxycodone and acetylsalicylic acid | R05DA06 | Normethadone |
| N02AJ19 | Oxycodone and ibuprofen | R05DA56 | Normethadone, combinations |
| N02AA55 | Oxycodone and naloxone | N02AA56 | Oxycodone and Naltrexone |
| N02AJ17 | Oxycodone and paracetamol | N07BC51 | Buprenorphine, combinations |
| N02AA03 | Hydromorphone | N07BC01 | Buprenorphine |
| N02AG04 | Hydromorphone with antispasmodics | N07BC21 | Buprenorphine and naloxone |
| N02AA53 | Hydromorphone and naloxone | N07BC06 | Diamorphin |
| N02AE01 | Buprenorphine | R05DA12 | Acetyldihydrocodeine |
| N01AH01 | Fentanyl | R05DA04 | Codeine |
| N02AB03 | Fentanyl | N02CX64 | Codeine, combinations |
| N01AH51 | Fentanyl, combinations | R05DA54 | Codeine, combinations |
| N02AX51 | Tilidine and naloxone | N02AA59 | Codeine, combinations excl. psycholeptics |
| N02AX02 | Tramadol | N02AA79 | Codeine, combinations with psycholeptics |
| N02AJ15 | Tramadol and other non-opioid analgesics | N02AJ07 | Codeine and acetylsalicylic acid |
| N02AJ14 | Tramadol and dexketoprofen | N02AJ09 | Codeine and other non-opioid analgesics |
| N02AJ13 | Tramadol and paracetamol | N02AJ05 | Codeine and diclofenac |
|  |  | N02AJ08 | Codeine and ibuprofen |
|  |  | N02AJ06 | Codeine and paracetamol |
|  |  | N02AA08 | Dihydrocodeine |
|  |  | R05DA14 | Dihydrocodeine |
|  |  | N02AA58 | Dihydrocodeine, combinations |
|  |  | R05DA64 | Dihydrocodeine, combinations |
|  |  | N02AJ02 | Dihydrocodeine and acetylsalicylic acid |
|  |  | N02AJ03 | Dihydrocodeine and other non-opioid analgesics |
|  |  | N02AJ01 | Dihydrocodeine and paracetamol |

| **Predictor**  **Supplementary Data – Table S2:** Included Predictors in the Regression Models, on claims data from AOK Baden-Württemberg, Germany, 2021 | **Operationalization in claims data** |
| --- | --- |
| Age in years | Continuous metric variable (years). |
| Sex | Categorical variable (1 = female; 2 = male). |
| Opioid formulations | Categorical variable representing the opioid formulations of prescribed opioids during the observation period: 1 = only long-acting opioids; 2 = only short-acting opioids; 3 = combination therapy with long-acting and short-acting opioids. |
| Opioid dose >120 mg morphine-equivalent | Binary variable indicating high opioid dose: 1 = average daily opioid dose >120 mg oral morphine equivalent; 0 = average daily opioid dose ≤120 mg oral morphine equivalent. The stepwise conversion of the DDD was performed according to the method described by Schrader et al [29].  The morphine-equivalent dose per patient was derived in several steps:  (1) identification of the total number of prescribed Defined Daily Doses (DDD) of each opioid per patient;  (2) rescaling of DDD values because they are stored in units of 1,000 DDD (DDD/1000);  (3) conversion of DDD into milligrams of active substance using an ATC-specific factor for the amount of mg per 1 DDD (DDD_FACTOR)A;  (4) conversion of the substance amount in mg into milligrams of oral morphine equivalent using an ATC-specific equianalgesic conversion factor (ME_FACTOR)B;  (5) aggregation of morphine-equivalent milligrams per patient across all opioid prescriptions and dichotomisation at >120 mg vs. ≤120 mg average daily morphine-equivalent dose; 365 days. |
| Somatoform pain disorder (ICD-10-GM: F45.40) | Binary variable (1 = diagnosis recorded; 0 = no diagnosis recorded). |
| Severe depressive episodes (ICD-10-GM: F32.2, F32.3, F33.2, F33.3) | Binary variable (1 = diagnosis recorded; 0 = no diagnosis recorded). |
| Harmful use of non-dependence substances (ICD-10-GM: F55.-) | Binary variable (1 = diagnosis recorded; 0 = no diagnosis recorded). |
| Disorders due to sedatives/hypnotics (ICD-10-GM: F13.-) | Binary variable (1 = diagnosis recorded; 0 = no diagnosis recorded). |
| Disorders due to alcohol (ICD-10-GM: F10.-) | Binary variable (1 = diagnosis recorded; 0 = no diagnosis recorded). |
| Disorders due to tobacco (ICD-10-GM: F17.-) | Binary variable (1 = diagnosis recorded; 0 = no diagnosis recorded). |

A) Fricke U, Günther J, Zawinell A. Anatomical-Therapeutic-Chemical Classification with Daily Doses for the German Pharmaceutical Market. Berlin: WIdO – Scientific Institute of the AOK; 2018.

B) Häuser W, Maier C, Petzke F, Radbruch L, Sabatowski R. Opioid Rotation (LONTS – Practice Tool 10). Berlin: AWMF; 2020.
